# Supplementary material for: Associations of Lifestyle Behaviour and Healthy Ageing in Five Latin American and the Caribbean Countries—A 10/66 Population-Based Cohort Study
Source: Nutrients. 2018 Oct 30;10(11):1593. doi: 10.3390/nu10111593 (PMC6266391; doi:10.3390/nu10111593)
Supplement: Supplementary file 1 [file nutrients-10-01593-s001.zip]

Archive with 5 entries (5 files):
- Supplementary File S1.pdf
- Supplementary File S2.pdf
- Supplementary File S3.pdf
- Supplementary File S4.pdf
- Supplementary File S5.pdf
