# Supplementary material for: Associations of Lifestyle Behaviour and Healthy Ageing in Five Latin American and the Caribbean Countries—A 10/66 Population-Based Cohort Study
Source: Nutrients. 2018 Oct 30;10(11):1593. doi: 10.3390/nu10111593 (PMC6266391; doi:10.3390/nu10111593)
Supplement: Supplementary file 1 [file nutrients-10-01593-s001.zip › Supplementary File S1.pdf]

**Table A1.1** Healthy Ageing Questions Origin.

| Items/Questions                                      | Origin                  | Questionnaire                           |
|------------------------------------------------------|-------------------------|-----------------------------------------|
| household responsibilities difficulty                | participant             | WHO-DAS II                              |
| walking a km difficulty                              | participant             | WHO-DAS II                              |
| washing whole body difficulty                        | participant             | WHO-DAS II                              |
| getting dressed difficulty                           | participant             | WHO-DAS II                              |
| carrying out work & everyday activities difficulty   | participant             | WHO-DAS II                              |
| making decisions difficulty                          | informant               | CSID'-RELScore                          |
| using the toilet difficulty                          | informant               | CSID'-RELScore                          |
| handling money difficulty                            | informant               | CSID'-RELScore                          |
| hearing problem                                      | participant & informant | Health (including pain and impairments) |
| eye problem                                          | participant & informant | Health (including pain and impairments) |
| finding right word difficulty                        | informant               | CSID'-RELScore                          |
| change in daily activities                           | informant               | CSID'-RELScore                          |
| forgets where he/she is                              | informant               | CSID'-RELScore                          |
| difficulty completing chores                         | informant               | CSID'-RELScore                          |
| sleep trouble or recent change in pattern            | participant             | Mental Health (GMS-version B3)          |
| feeling of not coping properly with everyday routine | participant             | Mental Health (GMS-version B3)          |
| gets worn out or exhausted during daytime or evening | participant             | Mental Health (GMS-version B3)          |
| time in seconds taken to walk 10 metres              | clinical examination    | neurological assessment (NEUROEX)       |
| learn test                                           | participant             | 10 words list learning                  |

|                              |             |        |
|------------------------------|-------------|--------|
| delayed recall               | participant | CSI'D' |
| long memory test             | participant | CSI'D' |
| immediate recall             | participant | CSI'D' |
| verbal fluency               | participant | CSI'D' |
| time orientation             | participant | CSI'D' |
| praxis-fold a piece of paper | participant | CSI'D' |
| story recall difficulty      | participant | CSI'D' |

WHO-DAS II: World Health Organization. Disability Assessment Schedule 2.0; CSI'D'-RELScore: Community Screening Interview for Dementia-Informant Scale; GMS: Geriatric Mental State Interview; NEUROEX: Neurological Examination; CSI'D': Community Screening Interview for Dementia.
