# Supplementary material for: Associations of Lifestyle Behaviour and Healthy Ageing in Five Latin American and the Caribbean Countries—A 10/66 Population-Based Cohort Study
Source: Nutrients. 2018 Oct 30;10(11):1593. doi: 10.3390/nu10111593 (PMC6266391; doi:10.3390/nu10111593)
Supplement: Supplementary file 1 [file nutrients-10-01593-s001.zip › Supplementary File S3.pdf]

**Table A3.1:** Baseline characteristics of participants included in our analyses and those excluded due to lost to follow-up survey or refused to participate.

| Country                             | Cuba                             |                                   |                  | Dominican Republic               |                                   |                 | Mexico                           |                                   |                 |
|-------------------------------------|----------------------------------|-----------------------------------|------------------|----------------------------------|-----------------------------------|-----------------|----------------------------------|-----------------------------------|-----------------|
| Characteristics                     | study participants<br>(n= 2,615) | not traced/<br>refused<br>(n=329) | missing<br>data* | study participants<br>(n= 1,664) | not traced/<br>refused<br>(n=347) | missing<br>data | study participants<br>(n= 1,671) | not traced/<br>refused<br>(n=332) | missing<br>data |
| Age (mean, SD)                      | 75.2 ± 7.08                      | 74.1 ± 6.63 †                     | 0.3%             | 75.4 ± 7.57                      | 74.6 ± 7.19                       | 0.0%            | 74.3 ± 6.61                      | 74.5 ± 6.91                       | 0.0%            |
| Gender-Female                       | 1697 (64.9%)                     | 216 (65.7%)                       | 0.0%             | 1104 (66.4%)                     | 221 (63.7%)                       | 0.1%            | 1063 (63.6%)                     | 205 (61.7%)                       | 0.0%            |
| Education Level-Completed primary   | 873 (33.5%)                      | 106 (32.2%)                       | 0.3%             | 295 (17.9%)                      | 75 (21.7%)                        | 1.1%            | 294 (17.6%)                      | 57 (17.2%)                        | 0.1%            |
| Ever smoked-no                      | 1421 (54.5%)                     | 194 (59.1%)                       | 0.3%             | 875 (52.6%)                      | 174 (50.1%)                       | 0.1%            | 1142 (68.3%)                     | 235 (70.8%)                       | 0.0%            |
| Drinking behaviour (moderate)       | 247 (9.6%)                       | 24 (7.5%)                         | 1.6%             | 95 (5.8%)                        | 24 (6.9%)                         | 1.0%            | 290 (17.5%)                      | 62 (18.8%)                        | 0.8%            |
| Physical activity (very and fairly) | 1757 (67.5%)                     | 220 (67.3%)                       | 0.5%             | 1040 (62.8%)                     | 224 (64.6%)                       | 0.4%            | 1063 (64.0%)                     | 228 (69.5%)                       | 0.7%            |
| Fruits/vegetables consumption       | 1965 (75.4%)                     | 218 (66.3%) †                     | 0.3%             | 834 (50.9%)                      | 191 (55.7%)                       | 1.5%            | 1184 (71.4%)                     | 232 (70.9%)                       | 0.7%            |
| Country                             | Peru                             |                                   |                  | Puerto Rico                      |                                   |                 |                                  |                                   |                 |
| Characteristics                     | study participants<br>(n= 1,463) | not traced/<br>refused<br>(n=470) | missing<br>data  | study participants<br>(n= 1,563) | not traced/<br>refused<br>(n=446) | missing<br>data |                                  |                                   |                 |
| Age (mean, SD)                      | 74.9 ± 7.48                      | 74.4 ± 6.98                       | 0.0%             | 76.3 ± 7.23                      | 76.6 ± 8.07                       | 0.0%            |                                  |                                   |                 |
| Gender-Female                       | 886 (60.6%)                      | 297 (63.2%)                       | 0.0%             | 1047 (67.2%)                     | 300 (67.6%)                       | 0.3%            |                                  |                                   |                 |
| Education Level-Completed primary   | 556 (38.4%)                      | 171 (36.5%) †                     | 1.0%             | 305 (19.5%)                      | 110 (24.7%)                       | 0.4%            |                                  |                                   |                 |
| Ever smoked-no                      | 1216 (83.6%)                     | 385 (81.9%)                       | 0.5%             | 1131 (72.6%)                     | 323 (72.7%)                       | 0.3%            |                                  |                                   |                 |
| Drinking behaviour (moderate)       | 63 (4.4%)                        | 21 (4.6%)                         | 2.7%             | 141 (9.1%)                       | 46 (10.4%)                        | 0.5%            |                                  |                                   |                 |
| Physical activity (very and fairly) | 996 (68.6%)                      | 338 (72.1%)                       | 0.8%             | 1009 (64.8%)                     | 269 (60.9%)                       | 0.3%            |                                  |                                   |                 |
| Fruits/vegetables consumption       | 1189 (82.5%)                     | 356 (76.2%) †                     | 1.4%             | 1155 (74.2%)                     | 312 (70.3%)                       | 0.4%            |                                  |                                   |                 |

Notes. SD: standard deviation; †: p value of the t test or the  $\chi^2 < 0.05$ ; \*: missing data on the characteristics in the sample of study participant.
