# Supplementary material for: Associations of Lifestyle Behaviour and Healthy Ageing in Five Latin American and the Caribbean Countries—A 10/66 Population-Based Cohort Study
Source: Nutrients. 2018 Oct 30;10(11):1593. doi: 10.3390/nu10111593 (PMC6266391; doi:10.3390/nu10111593)
Supplement: Supplementary file 1 [file nutrients-10-01593-s001.zip › Supplementary File S4.pdf]

**Table A4.1.** Associations between lifestyle behaviours and healthy ageing per gender.

| Men                                         |                        | Healthy Ageing*          |  |
|---------------------------------------------|------------------------|--------------------------|--|
| Lifestyle Behaviour                         | Adjusted OR † (95% CI) | I <sup>2</sup> ; p-value |  |
| <b>Physical Activity</b>                    |                        |                          |  |
| not very or never                           | Reference category     |                          |  |
| very or fairly                              | 2.30 (1.78-2.98)       | 59.5%; 0.042             |  |
| <b>Smoking</b>                              |                        |                          |  |
| former or current                           | Reference category     |                          |  |
| never                                       | 0.84 (0.67-1.06)       | 0.0%; 0.806              |  |
| <b>Drinking behaviour</b>                   |                        |                          |  |
| no or heavy drinking                        | Reference category     |                          |  |
| moderate drinking                           | 1.01 (0.77-1.32)       | 27.3%; 0.240             |  |
| <b>Consumption of fruits and vegetables</b> |                        |                          |  |
| < 3 in the last 3 days                      | Reference category     |                          |  |
| more than 3 in the last 3 days              | 1.23 (0.96-1.57)       | 0.0%; 0.751              |  |
|                                             |                        |                          |  |
| Women                                       |                        | Healthy Ageing*          |  |
| Lifestyle Behaviour                         | Adjusted OR † (95% CI) | I <sup>2</sup> ; p-value |  |
| <b>Physical Activity</b>                    |                        |                          |  |
| not very or never                           | Reference category     |                          |  |
| very or fairly                              | 2.70 (2.21-3.31)       | 53.2%; 0.073             |  |
| <b>Smoking</b>                              |                        |                          |  |
| former or current                           | Reference category     |                          |  |
| never                                       | 1.04 (0.85-1.27)       | 31.7%; 0.210             |  |
| <b>Drinking behaviour</b>                   |                        |                          |  |
| no or heavy drinking                        | Reference category     |                          |  |
| moderate drinking                           | 1.15 (0.76-1.74)       | 52.8%; 0.076             |  |
| <b>Consumption of fruits and vegetables</b> |                        |                          |  |
| < 3 in the last 3 days                      | Reference category     |                          |  |
| more than 3 in the last 3 days              | 1.25 (1.03-1.51)       | 0.0%; 0.448              |  |

Notes: CI: confidence interval; OR: Odds ratio; \*: healthy ageing compared to normal ageing or death; †: models are adjusted for age, gender, education level and all other lifestyle behaviour variables.
