# Supplementary material for: Associations of Lifestyle Behaviour and Healthy Ageing in Five Latin American and the Caribbean Countries—A 10/66 Population-Based Cohort Study
Source: Nutrients. 2018 Oct 30;10(11):1593. doi: 10.3390/nu10111593 (PMC6266391; doi:10.3390/nu10111593)
Supplement: Supplementary file 1 [file nutrients-10-01593-s001.zip › Supplementary File S5.pdf]

**Table A5.1.** Associations between lifestyle behaviours and healthy ageing.

**Healthy Ageing\***  
**Adjusted OR† (95% CI)**

| <b>Country/ Lifestyle Behaviour</b> | <b>Physical Activity</b><br>(very or fairly compared to not very or never) | <b>Smoking</b><br>(never compared to former or current) | <b>Drinking behaviour</b><br>(moderate drinking compared to never or heavy drinking) | <b>Consumption of fruits-vegetables</b><br>(three or more than three servings in the last three days compared to less than three) |
|-------------------------------------|----------------------------------------------------------------------------|---------------------------------------------------------|--------------------------------------------------------------------------------------|-----------------------------------------------------------------------------------------------------------------------------------|
| Cuba                                | 2.84 (2.28-3.52)                                                           | 1.02 (0.83-1.25)                                        | 0.98 (0.72-1.34)                                                                     | 1.49 (1.19-1.87)                                                                                                                  |
| Dominican Republic                  | 2.16 (1.64-2.85)                                                           | 1.34 (1.04-1.72)                                        | 1.53 (0.94-2.47)                                                                     | 1.31 (1.03-1.68)                                                                                                                  |
| Mexico                              | 2.47 (1.79-3.40)                                                           | 0.72 (0.52-1.00)                                        | 1.05 (0.73-1.50)                                                                     | 1.25 (0.94-1.68)                                                                                                                  |
| Peru                                | 3.14 (2.40-4.12)                                                           | 1.30 (0.89-1.89)                                        | 0.84 (0.41-1.72)                                                                     | 0.92 (0.65-1.30)                                                                                                                  |
| Puerto Rico                         | 3.56 (2.62-4.82)                                                           | 1.29 (0.95-1.76)                                        | 1.28 (0.83-1.97)                                                                     | 1.70 (1.27-2.29)                                                                                                                  |
| Pooled Effect                       | 2.79 (2.48-3.15)                                                           | 1.10 (0.98-1.25)                                        | 1.11 (0.92-1.33)                                                                     | 1.35 (1.20-1.52)                                                                                                                  |
| I <sup>2</sup> ; p-value            | 43.4%; 0.132                                                               | 64.0%; 0.025                                            | 0.0%; 0.493                                                                          | 50.7%; 0.088                                                                                                                      |

Notes: CI: confidence interval; OR: Odds ratio. \*: healthy ageing compared to normal ageing or death; healthy ageing group includes those participants who in the follow-up assessment were in the three highest fifths of the healthy ageing score distribution (i.e. better health level) and normal ageing group those who were in the two lowest fifths †: models are adjusted for age, gender, education level and all other lifestyle behaviour variables.
